# Supplementary material for: Mesoporous boron-doped onion-like carbon as long-life oxygen electrode for sodium–oxygen batteries
Source: Royal Society of Chemistry journal article supplement (doi:10.1039/c6ta00901h), 2016-01-01
Supplement: c6ta00901h1.pdf [file c6ta00901h1.pdf]

## Supporting Information

### **Mesoporous Boron-doped Onion-like Carbon as Long-Life Oxygen Electrode for Sodium-Oxygen Batteries**

Chaozhu Shu,<sup>a,b</sup> Yangming Lin,<sup>b</sup> Bingsen Zhang,<sup>b</sup> Sharifah Bee Abd Hamid,<sup>c</sup>

Dangsheng Su<sup>\*b</sup>

<sup>a</sup> College of Materials and Chemistry & Chemical Engineering, Chengdu University of Technology, Chengdu, Sichuan, 610059, P. R. China.

<sup>b</sup> Shenyang National Laboratory for Materials Science, Institute of Metal Research, Chinese Academy of Science, Shenyang, 110016, P. R. China.

<sup>c</sup> Nanotechnology&Catalysis Research Centre (NANOCAT), University of Malaya, IPS Building, Kuala Lumpur 50603, Malaysia.

\* Corresponding author. Fax: +86-24-83970019; Tel: +86-24-83970029; E-mail: [dssu@imr.ac.cn](mailto:dssu@imr.ac.cn)

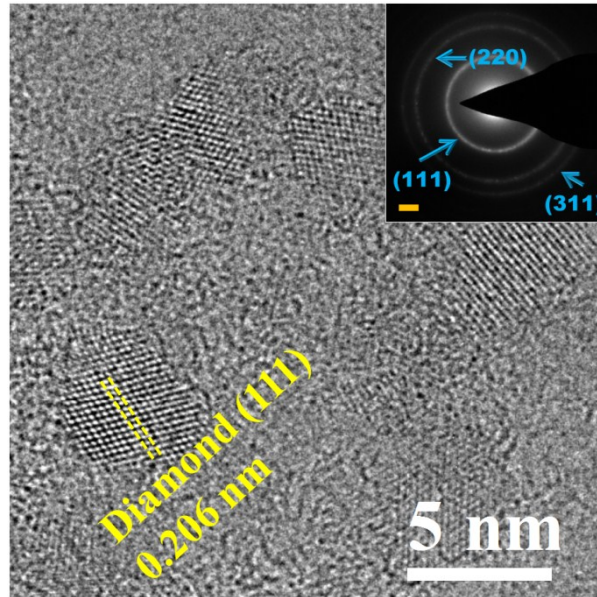

**Figure S1.** HRTEM image and SAED pattern (inset) of nanodiamond.

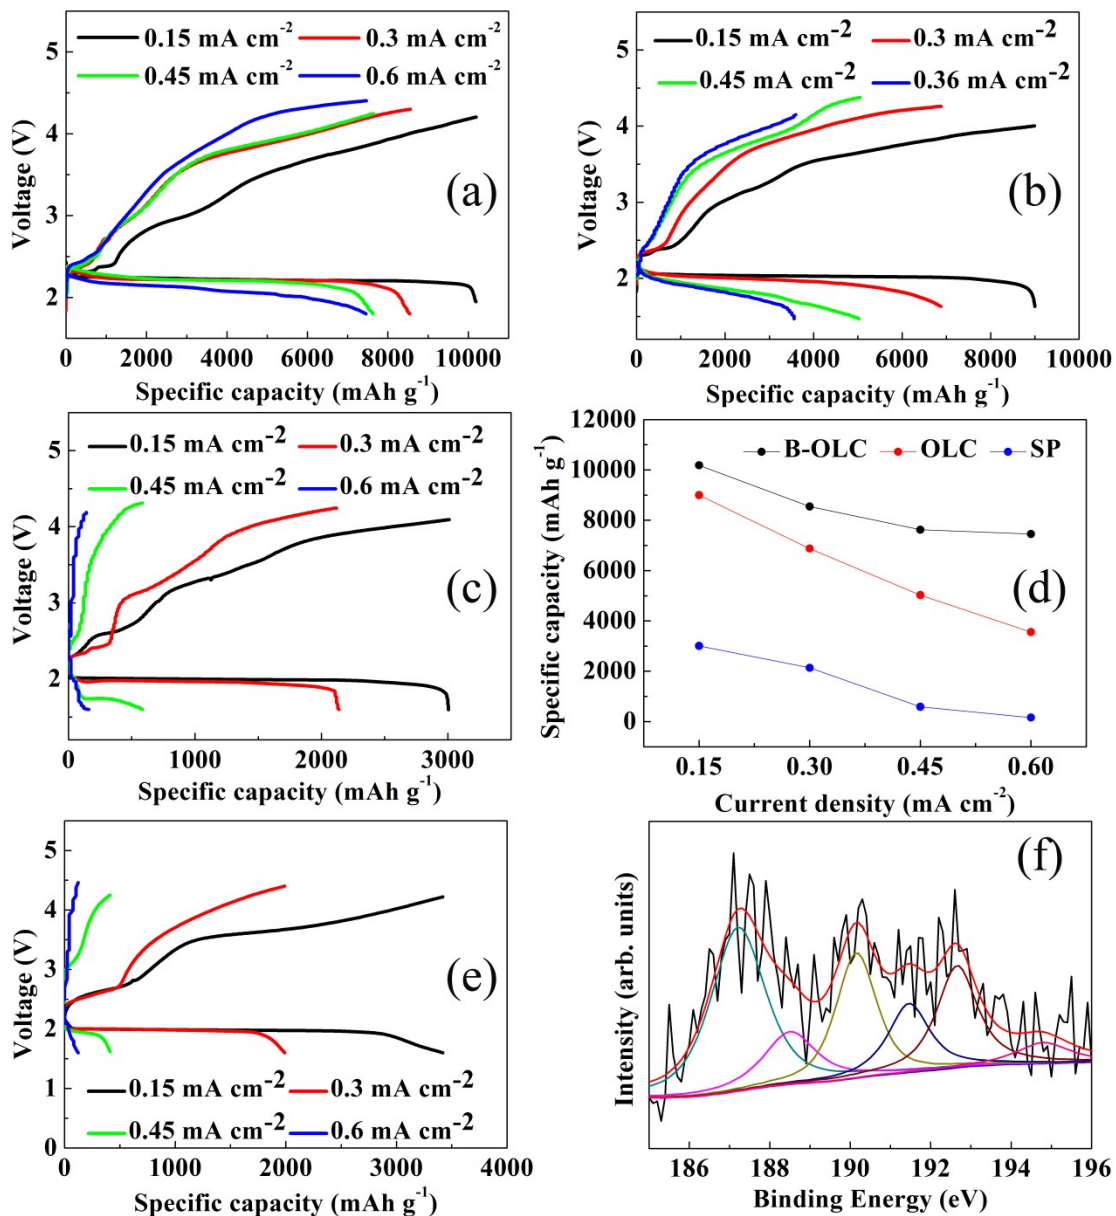

**Figure S2.** The discharge/charge profiles of the (a) B-OLC; (b) OLC and (c) Super P at various current densities. (d) Comparison of discharge specific capacity of Na-O<sub>2</sub> cells with the three kinds of O<sub>2</sub> electrodes at different current densities. (e) The discharge/charge profiles of the B-Super P at various current densities. (f) B 1s XPS spectra of B-Super P.

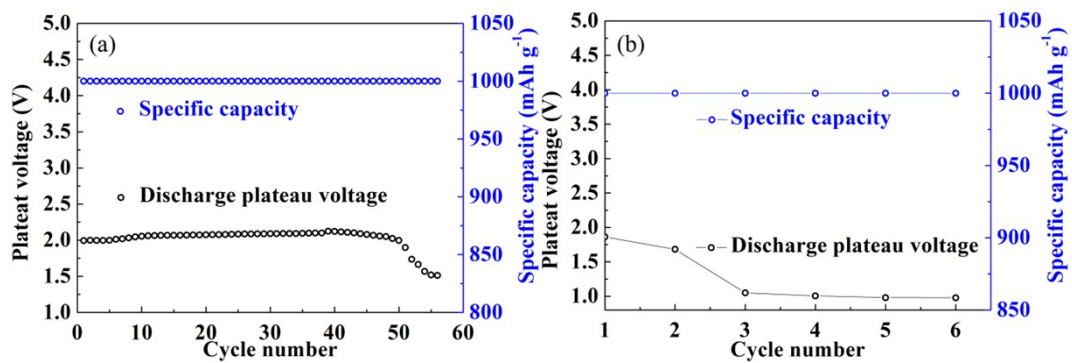

**Figure S3.** half-capacity voltage vs. cycle number for Na-O<sub>2</sub> batteries with (a) OLC and (b) Super P at a current density of 0.3 mA cm<sup>-2</sup>.

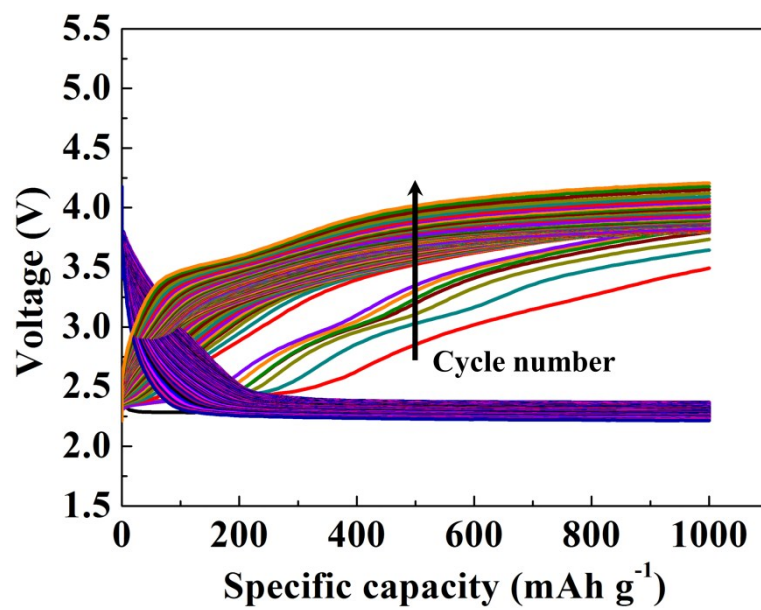

**Figure S4.** Consecutive restricted discharge and charge curves of Na-O<sub>2</sub> battery using B-OLC oxygen electrode at a current density of 0.3 mA cm<sup>-2</sup>.

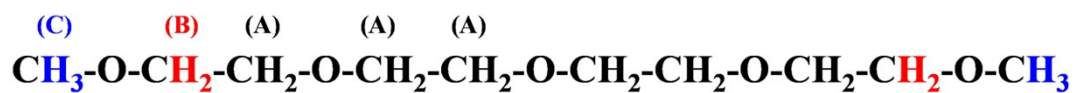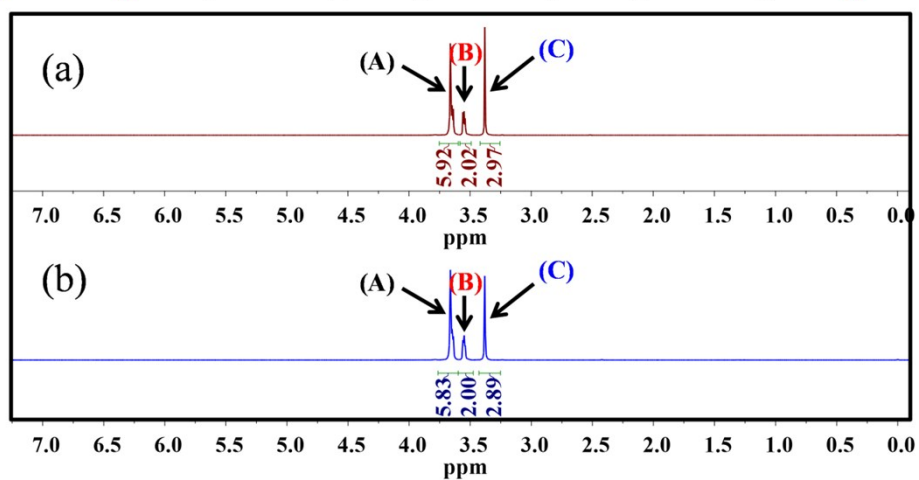

**Figure S5.**  $^1\text{H}$  NMR spectra of 1 M LiTFSI in TEGDME electrolyte (a) before and (b) after cycling.
